# Annals of Oncology

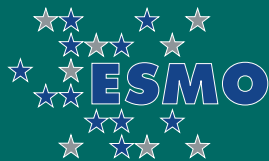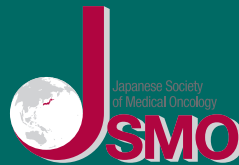

**Supplement 2:** ESMO Clinical Recommendations

**Guest Editors:**  
ESMO Guidelines Working Group

[www.annonc.oxfordjournals.org](http://www.annonc.oxfordjournals.org)  
[www.esmo.org](http://www.esmo.org)  
[www.jsmo.umin.jp](http://www.jsmo.umin.jp)

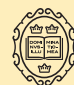

**OXFORD JOURNALS**  
OXFORD UNIVERSITY PRESS

# Annals of Oncology

Official Journal of the European Society for Medical Oncology and  
the Japanese Society of Medical Oncology

---

## editor-in-chief:

D. J. Kerr, *Oxford, UK*

## associate editors

M. S. Aapro, *Genolier, Switzerland*  
J. O. Armitage, *Omaha, Nebraska, USA*  
P. Boyle, *Lyon, France*  
K. Fizazi, *Villejuif, France*  
R. Labianca, *Bergamo, Italy*  
H. McLeod, *Chapel Hill, North Carolina, USA*  
L. Pahlman, *Uppsala, Sweden*  
M. Pfreundschuh, *Hamburg/Saar, Germany*  
C. J. A. Punt, *Nijmegen, The Netherlands*  
V. Raina, *New Delhi, India*  
N. Saijo, *Tokyo, Japan*  
N. Thatcher, *Manchester, UK*  
J. B. Vermorken, *Edegem, Belgium*  
D. A. Vorobiof, *Johannesburg, South Africa*  
H. Yoshikawa, *Tsukuba, Japan*

## editorial board

K. K. Antman, *New York, USA*  
J-P. Armand, *Villejuif, France*  
J. Baselga, *Barcelona, Spain*  
M. Bendandi, *Pamplona, Spain*  
C. Bokemeyer, *Hamburg, Germany*  
G. Bonadonna, *Milan, Italy*  
F. Cabanillas, *Houston, Texas, USA*  
C. J. Castro, *Bogota, Columbia*  
A. S. Coates, *Sydney, Australia*  
J. M. Connors, *Vancouver, Canada*  
H. Cortés-Funes, *Madrid, Spain*  
D. Cunningham, *Sutton, UK*  
S. Daryanani, *Caracas, Venezuela*  
C. Dittrich, *Vienna, Austria*  
L. H. Einhorn, *Indianapolis, Indiana, USA*  
E. A. Eisenhauer, *Kingston, Canada*  
S. Filipovic, *Niš, Serbia*  
B. Glimelius, *Uppsala, Sweden*  
A. Goldhirsch, *Milan, Italy*  
K. Hatake, *Tokyo, Japan*  
H. H. Hansen, *Copenhagen, Denmark*  
W. Hiddemann, *Munich, Germany*  
D. K. Hossfeld, *Hamburg, Germany*  
A. M. Hughes, *Macclesfield, UK*  
C. Ishioka, *Sendai, Japan*  
P. Jacobs, *Cape Town, South Africa*  
J. A. Jankowski, *Leicester, UK*

*Annals of Oncology* is devoted to the rapid circulation of scientific communications concerning oncology, particularly medical oncology. Its character, however, is multidisciplinary, in reflection of the proliferation of activities and interests globally and contributions on clinically oriented laboratory research, surgery and radiotherapy are assured by the presence of representatives of these disciplines on the Editorial Committee and Board.

*Annals of Oncology* is covered in C.A.B. International, Current Clinical Cancer, Current Contents/Clinical Medicine®, Current Contents/Life Sciences, Elsevier BIOBASE/Current Awareness in Biological Sciences, EMBASE/Excerpta Medica, IBIDS, Index Medicus/MEDLINE, The International Monitor in Oncology, Medical Documentation Service, Science Citation Index® and Science Citation Index Expanded.

## editor emeritus

F. Cavalli, *Bellinzona, Switzerland*

## CME editor

R. Midgley, *Oxford, UK*

Y. Kakehi, *Kagawa, Japan*  
N. Katsumata, *Tokyo, Japan*  
S. B. Kaye, *Sutton, UK*  
H. M. Khaled, *Cairo, Egypt*  
C-H. Köhne, *Dresden, Germany*  
P. A. Kosmidis, *Athens, Greece*  
H. Kunitoh, *Tokyo, Japan*  
T. Le Chevalier, *London, UK*  
J. S. Macdonald, *New York, USA*  
F. Mandelli, *Rome, Italy*  
G. Maseri, *Monza, Italy*  
P. Mauch, *Boston, Massachusetts, USA*  
R. J. Mayer, *Boston, Massachusetts, USA*  
M. Middleton, *Oxford, UK*  
H. Minami, *Kobe, Japan*  
V. M. Moiseyenko, *St Petersburg, Russian Federation*  
F. M. Muggia, *New York, USA*  
Y. Nagata, *Kyoto, Japan*  
T. Naoe, *Nagoya, Japan*  
T. Ngoma, *Dar es Salaam, Tanzania*  
K. Nishio, *Osaka, Japan*  
K. Öberg, *Uppsala, Sweden*  
A. Ohtsu, *Kashiwa, Japan*  
P. Parikh, *Mumbai, India*  
G. J. Peters, *Amsterdam, The Netherlands*  
M. Piccart, *Brussels, Belgium*

H. M. Pinedo, *Amsterdam, The Netherlands*  
M. Ranson, *Manchester, UK*  
R. Rosell, *Badalona, Spain*  
A. Roth, *Geneva, Switzerland*  
P. Rougier, *Boulogne, France*  
E. K. Rowinsky, *Branchburg, New Jersey, USA*  
M. Saghatelyan, *Villejuif, France*  
M. Sasako, *Nishinomiya, Japan*  
W. Scheithauer, *Vienna, Austria*  
H-J. Schmoll, *Halle, Germany*  
H. C. Schouten, *Maastricht, The Netherlands*  
G. Schwartzmann, *Porto Alegre, Brazil*  
K. C. Soo, *Singapore*  
C. N. Sternberg, *Rome, Italy*  
S. Tjulandin, *Moscow, Russian Federation*  
Y. Tokuda, *Isehara, Japan*  
M. Tonato, *Perugia, Italy*  
T. Tursz, *Villejuif, France*  
C. Vallejos Sologuren, *Lima Peru*  
E. Van Cutsem, *Leuven, Belgium*  
A. T. Van Oosterom, *Leuven, Belgium*  
M. Venturini, *Genoa, Italy*  
E. E. Vokes, *Chicago, Illinois, USA*  
J. Zalcberg, *Melbourne, Australia*

---

**executive editor:** Lewis Rowett

**editorial office:** Annals of Oncology, Via Luigi Taddei 4, CH-6962 Viganello-Lugano, Switzerland

## subscriptions

A subscription to *Annals of Oncology* comprises 12 issues plus supplements, with an Annual Author and Keyword Index in each volume. Prices include postage, and for subscribers outside the UK delivery is by Standard Air.

Annual Subscription Rate (Volume 19, 12 issues, 2008)

*Institutional* – Academic / Non profit only

Print and Online £925.00/\$1850.00/€1388.00

Online Only £879.00/\$1758.00/€1319.00

Print Only £879.00/\$1758.00/€1319.00

*Institutional* – Corporate

Print and Online £1110.00/\$2220.00/€1665.00

Online Only £1055.00/\$2110.00/€1583.00

Print Only £1055.00/\$2110.00/€1583.00

*Personal*

Print and Online £878.00/\$1756.00/€1317.00

Please note: US\$ rate applies to US & Canada, Euros applies to Europe, UK£ applies to UK and Rest of World.

There may be other subscription rates available, for a complete listing please visit [www.annonc.oxfordjournals.org/subscriptions](http://www.annonc.oxfordjournals.org/subscriptions)

Full prepayment, in the correct currency, is required for all orders. Orders are regarded as firm and payments are not refundable. Subscriptions are accepted and entered on a complete volume basis. Claims cannot be considered more than FOUR months after publication or date of order, whichever is later. All subscriptions in Canada are subject to GST. Subscriptions in the EU may be subject to European VAT. If registered, please supply details to avoid unnecessary charges. For subscriptions that include online versions, a proportion of the subscription price may be subject to UK VAT. Personal rate subscriptions are only available if payment is made by personal cheque or credit card and delivery is to a private address.

The current year and two previous years' issues are available from Oxford University Press. Previous volumes can be obtained from the Periodicals Service Company, 11 Main Street, Germantown, NY 12526, USA. Email: [psc@periodicals.com](mailto:psc@periodicals.com). Tel: +1 (518) 537 4700. Fax: +1 (518) 537 5899.

**For further information, please contact:** Journals Customer Service Department, Oxford University Press, Great Clarendon Street, Oxford OX2 6DP, UK. Email: [jnls.cust.serv@oxfordjournals.org](mailto:jnls.cust.serv@oxfordjournals.org). Tel (and answerphone outside normal working hours): +44 (0)1865 353907. Fax: +44 (0)1865 353485. **In the US, please contact:** Journals Customer Service Department, Oxford University Press, 2001 Evans Road, Cary, NC 27513, USA. Email: [jnorders@oxfordjournals.org](mailto:jnorders@oxfordjournals.org). Tel (and answerphone outside normal working hours): 800 852 7323 (toll-free in USA/Canada). Fax: 919 677 1714. **In Japan, please contact:** Journals Customer Services, Oxford University Press, Tokyo 4-5-8-10f Shiba, Minato-ku, Tokyo. Email: [okudaoup@po.ijnet.or.jp](mailto:okudaoup@po.ijnet.or.jp). Tel: +81 3 5444 5858. Fax: +81 3 3454 2929.

**DOI:** For information about DOIs and to resolve them, please visit <http://www.doi.org>

**Methods of payment.** (i) Cheque (payable to Oxford University Press, to Oxford University Press, Cashiers Office, Great Clarendon Street, Oxford OX2 6DP, UK) in GB£ Sterling (drawn on a UK bank), US\$ Dollars (drawn on a US bank), or EU€ Euros. (ii) Bank transfer to Barclays Bank Plc, Oxford Group Office, Oxford (bank sort code 20-65-18) (UK), overseas only Swift code BARC GB 22 (GB£ Sterling to account no. 70299332, IBAN GB89BARC20651870299332; US\$ Dollars to account no. 66014600, IBAN GB27BARC20651866014600; EU€ Euros to account

no. 78923655, IBAN GB16BARC20651878923655). (iii) Credit card (Mastercard, Visa, Switch or American Express).

*Annals of Oncology* (ISSN 0923-7534) is published monthly by Oxford University Press, Oxford, UK. Annual print subscript or price is £925/€1388/\$1850. *Annals of Oncology* is distributed by Mercury International, 365 Blair Road, Avenel, NJ 07001, USA Periodicals postage paid at Rahway, NJ and at additional entry points.

US Postmaster: send address changes to *Annals of Oncology* (ISSN 0923-7534), c/o Mercury International, 365 Blair Road, Avenel, NJ 07001, USA.

## supplements, reprints and corporate sales

For requests from industry and companies regarding supplements, bulk article reprints, sponsored subscriptions, translation opportunities for previously published material, and corporate online opportunities, please email: [special.sales@oxfordjournals.org](mailto:special.sales@oxfordjournals.org), fax: +44 (0) 865 353774 or visit [www.oxfordjournals.org/sales](http://www.oxfordjournals.org/sales).

## permissions

For information on how to request permissions to reproduce articles/information from this journal, please visit [www.oxfordjournals.org/permissions](http://www.oxfordjournals.org/permissions).

## advertising

Advertising, inserts and artwork enquiries should be addressed to Advertising and Special Sales, Oxford Journals, Oxford University Press, Great Clarendon Street, Oxford, OX2 6DP, UK. Tel: +44 (0)1865 354767; Fax +44 (0)1865 353774; E-mail: [jnlsadvertising@oxfordjournals.org](mailto:jnlsadvertising@oxfordjournals.org)

## oxford journals environmental and ethical policies

Oxford Journals is committed to working with the global community to bring the highest quality research to the widest possible audience. Oxford Journals will protect the environment by implementing environmentally friendly policies and practices wherever possible. Please see <http://www.oxfordjournals.org/ethicalpolicies.html> for further information on Oxford Journals' environmental and ethical policies.

## drug disclaimer

All reasonable precautions have been taken by the authors, editors and publisher to verify drug names and doses, the results of experimental work and the clinical findings published in this journal. The opinions expressed are those of the authors, and not necessarily those of the editors or publisher. The ultimate responsibility for the use and dosage of drugs mentioned in *Annals of Oncology* and in the interpretation of published material lies with the medical practitioner. The editors and publisher can accept no liability whatsoever in respect of any claim for damages arising therefrom. Please inform the editors of any errors.

© The European Society for Medical Oncology 2008

All rights reserved; no part of this publication may be reproduced, stored in a retrieval system, or transmitted in any form or by any means, electronic, mechanical, photocopying, recording, or otherwise without prior written permission of the Publishers, or a licence permitting restricted copying issued in the UK by the Copyright Licensing Agency Ltd, 90 Tottenham Court Road, London W1P 9HE, or in the USA by the Copyright Clearance Center, 222 Rosewood Drive, Danvers, MA 01923.

Typeset by TnQ Books and Journals Pvt. Ltd., Chennai, India.  
Printed by Bell and Bain Ltd., Glasgow, UK.
